- 1 Corresponding author: Ikuko Hara-Nishimura
- 2 Address: Faculty of Science and Engineering, Konan University, 8-9-1 Okamoto, Higashinada-ku, Kobe, Hyogo,
- 3 658-8501 Japan
- 4 Tel/Fax: +81-78-386-2861
- 5 E-mail: [ihnishi@gr.bot.kyoto-u.ac.jp](mailto:ihnishi@gr.bot.kyoto-u.ac.jp)
- 6
- 7 Membership of the Botanical Society of Japan:
- 8 Ikuko Hara-Nishimura: Yes
- 9 Kosei Iwabuchi: Yes
- 10
- 11 Subject area: (5) Physiology/Biochemistry/Molecular and Cellular Biology
- 12
- 13 Number of tables: one
- 14 Black-and-white figures: three
- 15 Color figures: four

## 16 **A space-saving visual screening method, *Glycine max* FAST, for generating** 17 **transgenic soybean**

18

19 Kosei Iwabuchi<sup>1,2,\*</sup>, Takashi L. Shimada<sup>3,\*</sup>, Tetsuya Yamada<sup>4</sup>, Ikuko Hara-Nishimura<sup>1,2</sup>

20

21 <sup>1</sup>Graduate School of Science, Kyoto University, Kyoto 606-8502, Japan

22 <sup>2</sup>Faculty of Science and Engineering, Konan University, Kobe 658-8501, Japan

23 <sup>3</sup>Graduate School of Horticulture, Chiba University, Chiba 263-8522, Japan

24 <sup>4</sup>Graduate School of Agriculture, Hokkaido University, Sapporo 060-8589, Japan

25 \* These authors contributed equally to this work.

26

27

### 28 **Abstract**

29 Soybean is an important crop plant for food and biofuel production, and there have been considerable efforts to  
30 develop transgenic soybean lines with higher seed oil contents and/or seed yields. However, the process of  
31 screening transgenic lines is laborious and requires a large amount of space. Here, we describe a powerful  
32 screening method, *Glycine max* Fluorescence-Accumulating Seed Technology (GmFAST), which is based on a  
33 seed-specific fluorescent marker. The marker is composed of a soybean seed-specific promoter coupled to the  
34 *OLE1-GFP* gene, which encodes GFP fused to the oil-body membrane protein OLEOSIN1 of *Arabidopsis*  
35 *thaliana*. We introduced the marker gene into cotyledonary nodes of *G. max* Kariyutaka via  
36 *Agrobacterium*-mediated transformation and regenerated heterozygous transgenic plants. OLE1-GFP-expressing  
37 soybean seeds can be selected nondestructively using a fluorescence stereomicroscope. Among T2 seeds, the  
38 most strongly fluorescent seeds were homozygous. GmFAST uses one-tenth of the growing space required for  
39 the conventional method. This space-saving method will contribute to facilitating transformation of soybean.  
40 OLE1-GFP was localized specifically to oil bodies in the cotyledon cells of seeds, but it did not affect oil content  
41 per seed, the size and density of the oil bodies, or oil composition. One of the homozygous lines (line #8)  
42 showed a 44% increase in the seed pod number, which resulted in 41% and 30% increases in seed yield and total  
43 oil production, respectively, compared with the wild type. In line #8, *OLE1-GFP* was inserted into the intron of  
44 Glyma13g30950, causing its overexpression. An increase in seed pod number was confirmed in *Arabidopsis*  
45 *thaliana* plants that overexpressed the Arabidopsis ortholog of Glyma13g30950, *E6L1*. These results suggest  
46 that line #8 is a valuable resource for agricultural and industrial applications. Taken together, GmFAST provides  
47 a space-saving visual and non-destructive screening method for soybean transformation, thereby increasing the  
48 chance of developing useful soybean lines.

49

50

51 **Keywords:** *Arabidopsis thaliana*, *Glycine max*, GmFAST, oil body, oleosin, seed production

## 52 Introduction

53 Soybean (*Glycine max*) is an agriculturally important crop that produces oil-rich and protein-rich seeds (19% oil  
54 and 35%–40% protein) (Tidke et al. 2015). Therefore, soybean seeds are used as a source of food and  
55 nutraceuticals. Oil seeds have recently gained attention as biofuel resources with the increasing demand for  
56 energy in emerging countries. The total world production of soybean reached 276 million tons in 2013 and is  
57 increasing (FAOSTAT; <http://faostat3.fao.org>).

58 Soybean oil is composed of five fatty acids; palmitic acid (C16:0), stearic acid (18:0), oleic acid (18:1),  
59 linoleic acid (18:2), and linolenic acid (18:3)(Clemente and Cahoon 2009). These fatty acids are sequestered in a  
60 specific organelle, the oil body, which is 0.5 to 2.0  $\mu\text{m}$  in diameter and surrounded by a lipid monolayer and  
61 membrane proteins including oleosin (Shimada and Hara-Nishimura 2010). Oleosin modulates the size of oil  
62 bodies (Abell et al. 1997; Shimada et al. 2008; Siloto et al. 2006) and the seed oil contents (Hu et al. 2009b;  
63 Shimada et al. 2008; Siloto et al. 2006). *Arabidopsis thaliana* has 16 oleosins, of which five (OLE1, OLE2,  
64 OLE3, OLE4, and OLE5) are expressed in seeds (Kim et al. 2002). Genetic engineering approaches based on  
65 oleosin function have been used to increase the seed oil content of rice; overexpression of a soybean oleosin  
66 increased the oil content of rice by 37%–46% compared with that of wild-type rice (Liu et al. 2013). However,  
67 whether this approach would also work in soybean seeds, where oil biosynthetic genes are reported to increase  
68 the oil content (Lardizabal et al. 2008; Rao and Hildebrand 2009), remains unknown.

69 The generation of transgenic plants involves two processes; introduction of the gene into plants, and  
70 screening of transgenic plants. Genes of interest are usually introduced via *Agrobacterium tumefaciens*-mediated  
71 transformation. The subsequent screening of transgenic plants is generally based on antibiotics or herbicides,  
72 since antibiotic- and herbicide-resistance genes are introduced into plants as selectable markers together with the  
73 gene(s) of interest. However, there are several problems associated with the screening process. Firstly,  
74 antibiotics/herbicides can inhibit plant growth. Secondly, screening requires aseptic techniques to prepare sterile  
75 seeds and agar plates containing antibiotics/herbicides, making the selection process time consuming and labor  
76 intensive.

77 To overcome these disadvantages, we previously established a method to select transgenic *Arabidopsis* and  
78 rice (*Oryza sativa*), designated as the FAST (Fluorescence-Accumulating-Seed Technology) method (Shimada  
79 et al. 2011; Shimada et al. 2010). This method relies on the FAST marker, in which a translational fusion gene  
80 encoding *Arabidopsis* OLE1 and green fluorescent protein (GFP), *OLE1-GFP*, is driven by a seed-specific  
81 promoter. The FAST marker is expressed in seeds, and the emission of GFP fluorescence in transgenic seeds  
82 allows for their easy and non-destructive isolation under a fluorescence stereomicroscope or blue LED  
83 handy-type instrument. Unlike conventional methods, the FAST method requires no aseptic techniques. This  
84 method reduced the time required to obtain homozygous transgenic plants from 7.5 months to 4 months in

85 *Arabidopsis* (Shimada et al. 2010). The objective of the present study was to establish the FAST method in  
86 soybean. To this end, a GmFAST marker was generated, in which *OLE1-GFP* was expressed under the control  
87 of the *GLYCININ* promoter of *G. max* (Fischer and Goldberg 1982; Nielsen et al. 1989; Scallon et al. 1985). This  
88 screening system was used in combination with *Agrobacterium*-mediated transformation of *G. max* cotyledonary  
89 nodes (Yamada et al. 2010). Since the 11S globulin *GLYCININ* is highly expressed in seeds (Meinke et al.  
90 1981; Schmidt et al. 2011), we examined the effect of *OLE1-GFP* on oil body organization and oil content in  
91 soybean seeds.

92

93

## 94 **Materials and Methods**

### 95 **Plant materials and growth conditions of soybean plants**

96 The Japanese soybean variety Kariyutaka was used as the wild type (WT), which was never placed in culture,  
97 and the *OLE1-GFP*-expressing plants were generated in the Kariyutaka background. Seeds were sown on  
98 compost and grown at 25°C under a 16-h light (white light at 100–150  $\mu\text{mol m}^{-2} \text{s}^{-1}$ ), 8-h dark photoperiod. After  
99 germination, the position of plant pots relative to the light source was changed daily to ensure that all plants  
100 received the same amount of light.

101

### 102 **Plant materials and growth conditions of *Arabidopsis thaliana***

103 *Arabidopsis thaliana* ecotype Columbia (Col-0) was used as the wild type. Seeds, which had been  
104 surface-sterilized with 70% ethanol and dried, were sown on Murashige-Skoog (MS) agar plates (Wako) and  
105 grown at 22°C under continuous 100  $\mu\text{mol m}^{-2} \text{s}^{-1}$  white light for 2–3 weeks. Plants were then transferred to  
106 vermiculite and further grown at 22°C under the light.

107

### 108 **Plasmid DNA construct for the GmFAST-G marker**

109 The *G. max* 11S globulin (*GLYCININ*) promoter (proGm11S, 1100 bp, accession AB353075) (Nakano et al.  
110 2014) was cloned and a genomic fragment of proGm11S was amplified by PCR using the following primers:  
111 forward, 5'-GCAAGCTTGCGAATTCTCTCTTATAAAAACACAAACAC-3' and reverse,  
112 5'-GCTCTAGAGCGTTTAAGGACCAATGGAGAGAATG-3'. Genomic DNA from *G. max* was used as the  
113 template for PCR. The amplified fragment was purified and amplified with Taq polymerase with the addition of  
114 adenine. The PCR product was inserted into the pGEM-T-Easy (Promega, Madison, WI, USA) vector to produce  
115 pGEM-proGm11S. Then, pGEM-proGm11S was treated with *Hind*III and *Xba*I to cut out the proGm11S  
116 fragment. pMDC123-IG (Yamada et al. 2010) was also treated with *Hind*III and *Xba*I to remove the 35S  
117 promoter region. The two fragments were ligated to produce the pMDC123-Gm11SIG vector.

118 A DNA fragment containing proGm11S, the *OLE1-GFP* gene, and the 35S terminator (ter35S) was  
119 amplified by overlapping PCR. In the first PCR, the proGm11S fragment was amplified using the following  
120 primers: forward, 5'-CACCGAATTCTCTCTTATAAAAACACAA-3' and reverse,  
121 5'-TGTATCCGCCATGTTTAAGGACCAATGGAG-3'. The template for PCR was pMDC123-Gm11SIG. The

122 *OLE1-GFP::ter35S* fragment was amplified using the following primers: forward,  
123 5'-TGGTCTTAAACATGGCGGATACAGCTAGA-3' and reverse,  
124 5'-GAATCCGACGTCGCATGCCTGCAGGTCA-3'. The template for PCR was  
125 pBGWF7-proOLE1::OLE1-GFP (Karimi et al. 2002; Shimada et al. 2010). In the second PCR, the  
126 proGm11S::OLE1-GFP::ter35S fragment was amplified using the following primers: forward,  
127 5'-CACCGAATTCTCTTATAAAACACAA-3' and reverse,  
128 5'-GAATCCGACGTCGCATGCCTGCAGGTCA-3'. The first PCR products were used as the templates for  
129 PCR. The proGm11S::OLE1-GFP::ter35S fragment was inserted into pENTER/D-TOPO (Invitrogen, Carlsbad,  
130 CA, USA) by the TOPO reaction to produce pENTR/proGm11S::OLE1-GFP::ter35S. The  
131 proGm11S::OLE1-GFP::ter35S fragment was amplified for use in the In-Fusion cloning system (Clontech  
132 Laboratories, Mountain View, CA, USA) using the following primers: forward,  
133 5'-CCAAGCTTGCGAATTCTCTTATAAAACACAAACACAATT-3' and reverse,  
134 5'-CCATGATTACGAATCCGACGTCGCATGCCTGCAGGTCACT-3'. The template for PCR was  
135 pENTR/proGm11S::OLE1-GFP::ter35S. Finally, the fragment was inserted into the *EcoRI* site of pMDC123  
136 (Curtis and Grossniklaus 2003) using the In-Fusion cloning system to produce the expression vector  
137 GmFAST-G.

138

### 139 **Plasmid DNA construct for *E6L1* overexpression**

140 The full-length genomic fragment of *A. thaliana E6L1*, starting from nucleotide 1 (corresponding to A of the  
141 start codon ATG) to nucleotide 804, was amplified by PCR using the primer set:  
142 5'-GCAGGCTCCGCGGCCATGGCTTTTTCCACTAGCTC-3' (forward) and  
143 5'-AGCTGGGTCCGCGCGTCATGGAGTGATCTGATCTC-3' (reverse). The PCR product was subcloned  
144 with In-Fusion HD Cloning Kit (Takara Bio Inc.) into pENTR/D-TOPO (Invitrogen) which was digested by  
145 *NotI* and *AseI*. The subcloned sequence was then transferred into the pH2GW7 vector (Karimi et al. 2002) via a  
146 recombination reaction with LR Clonase (Invitrogen), yielding the pH2GW7-E6L1 vector.

147

### 148 **Transformation of soybean plants**

149 *Agrobacterium*-mediated transformation was performed as described previously (Yamada et al. 2010). The  
150 cotyledonary nodes of Kariyutaka were prepared for infection with *A. tumefaciens* EHA105 harboring  
151 GmFAST-G. The T0 plants were selected based on resistance to glufosinate-ammonium (Sigma-Aldrich, St.  
152 Louis, MO, USA). The inheritance of the transgene was confirmed based on seedling resistance to Basta (Bayer  
153 Crop Science, Monheim, Germany). In addition, mature seeds emitting GFP were selected under a fluorescence  
154 stereomicroscope (MVX10, Olympus, Tokyo, Japan). Three independent lines (#30, #2, and #8) were  
155 established, and homozygous T3 plants were used in further analyses.

156

### 157 **Stable transformation of Arabidopsis plants**

158 The binary vector pH2GW7-E6L1 was introduced into *A. thaliana* (Col-0) plants with *Agrobacterium*  
159 *tumefaciens* (strain GV3101) using the floral dip method (Bechtold and Pelletier 1998) to generate *E6L1*

160 overexpression (E6L1-OX) plants.

161

### 162 **SDS-PAGE and immunoblotting for soybean**

163 Three dry seeds were broken into small pieces with a hammer and ground to a powder with a mortar and pestle  
164 in liquid nitrogen. Fifty milligrams of each powdered sample was diluted in 10 ml sample buffer [50 mM  
165 Tris-HCl, pH 6.8, 2% w/v sodium dodecyl sulfate (SDS), 6% v/v  $\beta$ -mercaptoethanol, and 10% v/v glycerol],  
166 mixed well, boiled at 99°C for 5 min, and then centrifuged at  $9,000 \times g$  for 1 min. A 1-mL aliquot of the  
167 supernatant was mixed with 50  $\mu$ l bromophenol blue, and then the extracted proteins were separated by  
168 SDS-PAGE on a precast gel (Bio-Rad, Hercules, CA, USA) at a constant voltage of 200 V for 45 min. The gel  
169 was stained with Coomassie Brilliant Blue (CBB).

170 For immunoreaction experiments, gel-separated proteins were transferred onto a polyvinylidene fluoride  
171 membrane using the iBlot system (Invitrogen, Carlsbad, CA, USA). The membrane was blocked with skim milk  
172 in TBST buffer (20 mM Tris-HCl, pH 7.5, 150 mM NaCl, and 0.05% Tween-20). The primary antibody reaction  
173 was performed with anti-OLE1 diluted 1:2000 or anti-GFP diluted 1:5000 in TBST buffer for 1 h. The  
174 secondary antibody reaction was performed with anti-mouse IgG-HRP diluted 1:5000 or anti-rabbit IgG-HRP  
175 diluted 1:5000 for 30 min. After the reaction of HRP-conjugated secondary antibody with ECL (GE Healthcare  
176 Life Sciences, Buckinghamshire, United Kingdom), chemiluminescence was visualized using a LAS-3000  
177 LuminoImage analyzer (FujiFilm, Tokyo, Japan).

178

### 179 **DNA isolation and PCR analysis for soybean**

180 Dry seeds were broken into small pieces with a hammer and then ground to a powder with a mortar and pestle in  
181 liquid nitrogen. Genomic DNA was purified from seeds of *G. max* with a DNeasy plant mini kit (Qiagen, Hilden,  
182 Germany) as per the manufacturer's instructions. The primer sets used to amplify the OLE1, GFP, and  
183 OLE1-GFP fragments were as follows: 5'-ACCCACAGGGATCAGACAAG-3' (OLE1 forward) and  
184 5'-GTTCCCCACCAGTATGTTGC-3' (OLE1 reverse), and  
185 5'-CACCATGGTGAGCAAGGGCGAGGAGCTGTT-3' (GFP forward) and  
186 5'-TCAGAGATCTCCCTTGTACAGCTCGTCCAT-3' (GFP reverse). The PCRs were performed with  
187 MightyAmp DNA polymerase (Takara, Otsu, Japan) under the following conditions: 40 cycles of 98°C for 10 s,  
188 55°C for 30 s, and 72°C for 60 s.

189

### 190 **Fluorescence microscopy for soybean**

191 Dry seeds were fixed in fixation buffer (50 mM PIPES, 10 mM EGTA, and 5 mM MgSO<sub>4</sub>, pH 7.0) containing  
192 2% formaldehyde and 0.3% glutaraldehyde overnight. The GFP fluorescence of seed cotyledons was observed  
193 under a fluorescence stereomicroscope (Zeiss, Oberkochen, Germany) or a confocal laser scanning microscope  
194 (LSM780 META; Zeiss). The mean GFP fluorescence level of dry seeds was determined using Image J software  
195 (<http://rsb.info.nih.gov/ij>).

196 To visualize lipids, the fixed seed cotyledons were stained with 5  $\mu$ g/ml Nile red and observed under a  
197 confocal laser scanning microscope (Zeiss LSM780 META).

198

### 199 **Transmission electron microscopy for soybean**

200 Dry seeds were cut into approximately 1 × 1 mm pieces using a razor blade and fixed with 4% paraformaldehyde  
201 and 2% glutaraldehyde in 0.05 M cacodylate buffer, and then with 2% osmium tetroxide in 0.05 M cacodylate  
202 buffer. After dehydration, samples were embedded in Quetol 651 resin (Electron Microscopy Sciences, Hatfield,  
203 PA, USA). Ultrathin sections (80 nm) were prepared, stained with uranyl acetate in lead stain solution, and  
204 observed under a transmission electron microscope (JEM-1400Plus; JEOL, Tokyo, Japan).

205

### 206 **Number of seeds and seed pods, and seed weight measurements for soybean**

207 The T3 plants were grown under the conditions described above until the seed pods were completely dry, and  
208 then the seeds were harvested together with their pods. The number of seeds per plant was counted and the total  
209 seed weight per plant was measured with a digital electronic balance (XS105DU; Mettler Toledo, Greifensee,  
210 Switzerland). The number of pods per plant was also counted, and the percentage of pods with one, two, or three  
211 seeds on each plant was calculated.

212

### 213 **Fatty acid content analysis for soybean**

214 The fatty acid content of T4 dry seeds was analyzed as described previously (Yamada et al. 2014). Mature seeds  
215 were ground using a mortar and pestle. The fatty acid content (palmitic, oleic, linoleic, and linolenic acids) was  
216 determined by gas chromatography based on the ratio of the areas of respective peaks to that of heptadecanoic  
217 acid. Lipid content was calculated as the total fatty acid content.

218

### 219 **An adapter ligation-mediated PCR for soybean**

220 The site of *OLE1-GFP* insertion in the genome of *OLE1-GFP* transgenic line #8 was determined by an adapter  
221 ligation-mediated PCR as reported previously (O'Malley et al. 2007). Briefly, total DNA was isolated from seeds  
222 with a DNeasy Plant Mini Kit (Qiagen) according to the manufacturer's instructions. Total DNA was digested  
223 with restriction enzymes (Hind III and Eco RI), and the digested DNA was ligated to the following primers:  
224 5'-GTAATACGACTCACTATAGGGCAGCGTGGTCGACGGCCCCGGGCTGC-3' (long strand of adapter 1  
225 for Hind and Eco), 5'-AGCTGCAGCCCG-3' (short strand of adapter Hind), and 5'-AATTGCAGCCCG-3'  
226 (short strand of adapter Eco). The DNA was amplified by a nested PCR using the following primer sets: 5'-  
227 AGTCGACCGTGTACGTCTCC-3' (pMDC123\_LB1) and 5'-GTAATACGACTCACTATAGGGC-3' (AP1)  
228 for 1<sup>st</sup> PCR; 5'-GTTTCTGGCAGCTGGACTTC-3' (pMDC123\_LB2) and 5'- TGGTCGACGGCCCCGGGCTGC  
229 -3' (AP2) for 2<sup>nd</sup> PCR, 5'-AAAAACGTCCGCAATGTGTT-3' (pMDC123\_LB3) and 5'-  
230 TGGTCGACGGCCCCGGGCTGC -3' (AP2) for 3<sup>rd</sup> PCR. The 3<sup>rd</sup> PCR products were subjected to agarose gel  
231 electrophoresis, and DNA fragments of interest were excised from the gel and purified. The DNA fragments  
232 were sequenced using a genetic analyzer (3130xl; ABI). Insertion of *OLE1-GFP* into Glyma13g30950 was  
233 confirmed by genotyping PCR using the following primer sets: 5'-ACTGTAGGCTTGATGCCACT-3'  
234 (forward) and 5'-TCCTCTACGTCATTCGATGG-3' (reverse); 5'-AAAAACGTCCGCAATGTGTT-3'  
235 (pMDC123\_LB3) and 5'-TCCTCTACGTCATTCGATGG-3' (reverse).

236

### 237 **Reverse transcription PCR for soybean**

238 Total RNA was isolated from soybean leaves using RNeasy Plant Mini Kit (Qiagen) according to the  
239 manufacturer's instructions. Total RNA was subjected to first-strand cDNA synthesis using Ready-To-Go  
240 RT-PCR Beads (GE Healthcare), and the cDNA was amplified by PCR using the following primer sets:  
241 5'-TTTTCTCACCACCTTTTG -3' (forward) and 5'-CGGAATGAAAGGTGGTTGTT-3' (reverse);  
242 5'-ATCTTGACTGAGCGTGGTTATCC-3' (forward) and 5'-GCTGGTCCTGGCTGTCTCC-3' (reverse) for  
243 *ACTIN11* (Hu et al. 2009a). The size of PCR products of Glyma13g30950 and *ACTIN11* was 164 and 126 bp,  
244 respectively.

245

### 246 **Reverse transcription PCR for Arabidopsis**

247 Total RNA was isolated from Arabidopsis seedlings using RNeasy Plant Mini Kit (Qiagen). The RNA was  
248 used for cDNA synthesis using ReverTra Ace qPCR RT Master Mix (Toyobo), followed by PCR using the  
249 following primer sets: 5'-ATGGCTTTTCCACTAGCTC-3' (forward) and  
250 5'-TCATGGAGTGATCTGATCTC-3' (reverse) for *E6L1*, and 5'-ACTGGAGGTTTTGAGGCTGGTAT-3'  
251 (forward) and 5'-GCACCGTTCCAATACCAATC-3' (reverse) for *EF1a*. The size of PCR products of  
252 *E6L1* and *EF1a* was 804 and 494 bp, respectively.

253

### 254 **Number of seeds and seed pods, and seed weight measurements for Arabidopsis**

255 Wild-type and E6L1-OX plants (T2 generation) were grown until the seed pods were completely dried. For  
256 confirming whether the T2 plants contained the transgene, the following primer sets were used for genotyping by  
257 PCR: 5'-ATGAAAAGCCTGAACTCACCGC-3' (forward) and 5'-CTATTCCTTTGCCCTCGGACGAG-3'  
258 (reverse) for hygromycin-resistant gene. The seed pods in each plant were counted before seed harvesting. The  
259 seeds were harvested in each plant, and then the total seed weight per plant was measured with a digital  
260 electronic balance (GH-120; A&D Company, Tokyo, Japan). The weight of 100 seeds were measured with the  
261 digital electronic balance (GH-120) for calculating the weight of one seed. According to the data, the number of  
262 seeds per plant and per pod were calculated.

263

264

## 265 **Results and Discussion**

### 266 **Identification of transgenic soybean seeds by GmFAST**

267 The FAST system for soybean was established by constructing the GmFAST-G vector, which contains the  
268 *OLE1-GFP* fusion gene driven by the *G. max* 11S globulin promoter (Fig. 1A). The GmFAST-G vector was  
269 introduced into cotyledonary nodes of *G. max* Kariyutaka through *Agrobacterium*-mediated transformation.  
270 After the regeneration of transgenic plants from independent cotyledonary nodes, T1 mature seeds were  
271 harvested and grown to obtain the T2 seed population, which contained homozygous, heterozygous, and WT



272 seeds. Next, we carried out T2 seed selection based on the GmFAST method. The GFP fluorescence levels are  
273 reflective of the GmFAST-G vector copy numbers: two and one in homozygotes and heterozygotes, respectively  
274 (Shimada et al. 2010). Therefore, we selected strongly fluorescent seeds from independent T2 seed populations  
275 using a fluorescence stereomicroscope and finally obtained T3 seeds from three independent transgenic lines  
276 designated as #2, #8, and #30 (Fig. 1B). The GFP fluorescence intensity levels of lines #2 and #8 were twice that  
277 of WT, whereas the GFP fluorescence of line #30 was lower and similar to that of WT (Fig. 1C). The  
278 homozygosity of these lines was confirmed by a non-destructive segregation analysis of the T3 seeds using a  
279 fluorescence stereomicroscope. As expected, all the T3 seeds from each line emitted GFP fluorescence,  
280 indicating that they were homozygous. The insertion of the *OLE1-GFP* gene in all three transgenic lines was  
281 also confirmed by genotyping (Fig. 1D, upper). An immunoblot analysis showed that the OLE1-GFP protein  
282 was expressed in lines #2 and #8, but was not expressed at detectable levels in line #30 (Fig. 1D, middle). Thus,  
283 the GmFAST method enables the isolation of homozygous plants in the T2 generation.

284

#### 285 **Intracellular localization of OLE1-GFP in transgenic soybean seeds**

286 An analysis of the localization of OLE1-GFP in transgenic seeds showed that it was exclusively expressed in  
287 seed cotyledons in lines #2 and #8 (Fig. 2A; #2 and #8). In the palisade mesophyll cells of cotyledons,  
288 OLE1-GFP showed a meshwork-like expression pattern (Fig. 2B, left), similar to the distribution pattern of the  
289 oil bodies stained with Nile red (Fig. 2B, right). These results suggested that OLE1-GFP was functional in oil  
290 bodies.

291 Next, we examined the effects of OLE1-GFP on oil body organization in transgenic seeds using  
292 transmission electron microscopy. As previously reported (Herman and Larkins 1999; Schmidt et al. 2011;  
293 Yamada et al. 2014), seed cotyledon cells contained many oil bodies and several protein storage vacuoles (PSVs)  
294 in all the plants examined (Fig. 3, left). No differences in the size and density of oil bodies were observed  
295 between WT seeds and seeds of lines #30 and #2 (Fig. 3, right). This could be attributed to the low expression  
296 levels of OLE1-GFP. However, compared with WT seeds, line #8 seeds had oil bodies that were relatively small  
297 and densely distributed (Fig. 3, right). Line #8 also exhibited an altered PSV organization (Fig. 3, left). These  
298 results were consistent with previous reports that the oleosin contents affects both oil-body sizes and PSV  
299 organization in *Arabidopsis* and soybean (Schmidt and Herman 2008; Shimada et al. 2008; Siloto et al. 2006).

300

#### 301 **Seed production characteristics and seed oil contents in transgenic soybean plants**

302 The seed production of each transgenic line was examined. Under our experimental conditions, line #8 showed a  
303 44% increase in seed pod number per plant compared with WT (Fig. 4A). Line #8 also showed 41% increases in

304 total seed weight per plant (Fig. 4B) and 47% seed grain number per plant compared with WT (Fig. 4C).  
305 However, the average weight per seed (Fig. 4D) and the proportions of one-, two-, and three-seed pods (Fig. 4E)  
306 did not differ significantly between WT and line #8. Lines #2 and #30 did not show any changes in the above  
307 parameters compared with WT (Fig. 4). Considering the comparable expression levels of *OLE1-GFP* in lines #2  
308 and #8 (Fig. 1C), the higher seed production of #8 might not be related to *OLE1-GFP* function. Instead, the  
309 insertion position of the *OLE1-GFP* gene in the genome might be responsible for the higher seed production in  
310 line #8.

311 Next, we examined the fatty acid contents of transgenic seeds. Line #8 showed a 30% increase in total oil  
312 production per plant compared with WT. The amounts of palmitic acid (C16:0), stearic acid (C18:0), and  
313 linolenic acid (C18:3) were higher in seeds of line #8 than in seeds of WT (Fig. 5A). However, the total fatty  
314 acid content based on seed weight was similar among all three transgenic lines (including line #8) and WT (Fig.  
315 5B). Consequently, line #8 may be a valuable resource for agricultural and industrial applications.

316 In a previous study, the oil content increased by ~40% in the transgenic rice grains that expressed soybean  
317 oleosin under the control of the RICE EMBRYO GLOBULIN-2 PROTEIN (REG-2) promoter (Liu et al. 2013).  
318 However, no increase in the oil content based on seed weight was observed in soybean seeds that expressed the  
319 oleosin gene *OLE1* under the control of the soybean 11S globulin (GLYCININ) promoter (Fig. 5B), possibly  
320 because soybean seeds inherently have much higher oil contents than rice grains.

321

### 322 **Site of the *OLE1-GFP* insertion in the transgenic soybean line #8 genome**

323 Because the phenotype of line #8 could be result from an insertion mutation of *OLE1-GFP*, we performed an  
324 adapter ligation-mediated PCR (O'Malley et al. 2007) to locate the insertion site of *OLE1-GFP* in its genome.  
325 *OLE1-GFP* was inserted in the intron of Glyma13g30950, and this was confirmed using genotyping PCR (Fig.  
326 6A and 6B). Intriguingly, the *OLE-GFP* insertion enhanced the transcript level of Glyma13g30950 in #8,  
327 compared with the wild type, #2, and #30 (Fig. 6C).

328

### 329 **The effects of *E6L1* on seed pod number in Arabidopsis**

330 To support our hypothesis that Glyma13g30950 is involved in seed pod formation, we investigated the function  
331 of the Glyma13g30950 ortholog in Arabidopsis. From a BLAST analysis using the amino acid sequence of  
332 Glyma13g30950.2, a candidate for an Arabidopsis orthologs, an *E6-like1* gene (*E6L1*; At2g33850), was found.  
333 Then, we generated transgenic Arabidopsis plants overexpressing *E6L1* (*E6L1-OX*) (Fig. S1). Of three lines  
334 analyzed (#2, #6, and #12), line #2 exhibited a statistically significant increase in seed pod number compared  
335 with WT (Fig. 7A), although there were no remarkable changes between WT and the three *E6L1-OX* lines in the

336 total seed weight per plant, total seed grain number per plant, the weight per seed, or the seed number per pod  
337 (Fig. 7B–E). These results suggest that *E6L1* is involved in regulating the seed pod number. According to the  
338 Arabidopsis eFP browser (<http://bar.utoronto.ca/efp/cgi-bin/efpWeb.cgi>), *E6L1* is expressed weakly at the  
339 inflorescence shoot apex that includes the shoot apical meristem producing floral meristem. In *E6L1-OX*,  
340 overexpressed *E6L1* may stimulate the shoot apical meristem to produce more flowers than WT plants, resulting  
341 in an increase of seed pod numbers.

342

## 343 **Conclusions**

344 The results of this study showed that GmFAST, combined with *Agrobacterium*-mediated transformation using  
345 cotyledonary nodes, is an efficient and powerful method to establish homozygous soybean lines. Compared with  
346 the conventional method, which requires a large space to grow soybean plants for the selection of homozygous  
347 transgenic plants and for segregation analyses, the GmFAST method simply requires the selection of the most  
348 strongly fluorescent T2 seeds based on the expression of a fluorescent marker using a fluorescence  
349 stereomicroscope. This reduces the space requirement to at least one-tenth of that required for conventional  
350 methods (Table 1). We also generated a transgenic line with an increased seed yield. This line could be valuable  
351 in agriculture and industry. Thus, the space-saving GmFAST method will facilitate soybean transformation,  
352 which will increase the chance of developing useful soybean lines.

353 **Acknowledgments**

354 We are grateful to Makoto Hayashi (Nagahama Institute of Bio-Science and Technology, Japan) for his kind  
355 donation of the anti-OLE1 antibody, and to Masatake Kanai (National Institute for Basic Biology, Japan) and Yu  
356 Tanaka (Kyoto University, Japan) for their technical advice for plant cultivation. This work was supported; by  
357 Specially Promoted Research of Grants-in-Aid to I.H.-N. (no. 22000014), by Grants-in-Aid for Scientific  
358 Research to I.H.-N. (no. 15H05776), to T.L.S. (nos. 16K18834 and 19K05809), and to K.I. (nos. 17K15145 and  
359 18H05496) from the Japan Society for the Promotion of Science (JSPS), by Core Research for Evolutional  
360 Science & Technology to I.H.-N. and to T.Y. (CREST, 109178) of Japan Science and Technology Agency (JST,  
361 <https://www.jst.go.jp/EN/index.html>), and by the Hirao Taro Foundation of KONAN GAKUEN for Academic  
362 Research to I.H.-N.

363

364

365 **Author contributions**

366 K.I., T.L.S., and I.H.-N. conceived the study. K.I. and T.Y. performed experiments with *Glycine max*.  
367 T.L.S. performed experiments with *Arabidopsis thaliana*. K.I., T.Y., T.L.S., and I.H.-N. analyzed whole  
368 data and wrote the manuscript.

369

370

371 **Additional information**

372 Supplementary information is available online.

373

374

375 **Competing interests:** The authors declare no competing financial or non-financial interests.

## 376 **References**

- 377 Abell BM, Holbrook LA, Abenes M, Murphy DJ, Hills MJ, Moloney MM (1997) Role of the proline knot motif  
378 in oleosin endoplasmic reticulum topology and oil body targeting. *Plant Cell* 9:1481-1493
- 379 Bechtold N, Pelletier G (1998) In planta *Agrobacterium*-mediated transformation of adult *Arabidopsis thaliana*  
380 plants by vacuum infiltration. *Methods Mol Biol* 82:259-266
- 381 Clemente TE, Cahoon EB (2009) Soybean oil: genetic approaches for modification of functionality and total  
382 content. *Plant Physiol* 151:1030-1040
- 383 Curtis MD, Grossniklaus U (2003) A gateway cloning vector set for high-throughput functional analysis of  
384 genes in planta. *Plant Physiol* 133:462-469
- 385 Fischer RL, Goldberg RB (1982) Structure and flanking regions of soybean seed protein genes. *Cell* 29:651-660
- 386 Herman EM, Larkins BA (1999) Protein storage bodies and vacuoles. *Plant Cell* 11:601-614
- 387 Hu R, Fan C, Li H, Zhang Q, Fu YF (2009a) Evaluation of putative reference genes for gene expression  
388 normalization in soybean by quantitative real-time RT-PCR. *BMC Mol Biol* 10:93
- 389 Hu Z, Wang X, Zhan G, Liu G, Hua W, Wang H (2009b) Unusually large oilbodies are highly correlated with  
390 lower oil content in *Brassica napus*. *Plant Cell Rep* 28:541-549
- 391 Karimi M, Inze D, Depicker A (2002) GATEWAY vectors for *Agrobacterium*-mediated plant transformation.  
392 *Trends Plant Sci* 7:193-195
- 393 Kim HU, Hsieh K, Ratnayake C, Huang AH (2002) A novel group of oleosins is present inside the pollen of  
394 *Arabidopsis*. *J Biol Chem* 277:22677-22684
- 395 Lardizabal K, Effertz R, Levering C, Mai J, Pedroso MC, Jury T, Aasen E, Gruys K, Bennett K (2008)  
396 Expression of *Umbelopsis ramanniana* DGAT2A in seed increases oil in soybean. *Plant Physiol* 148:89-96
- 397 Liu WX, Liu HL, Qu le Q (2013) Embryo-specific expression of soybean oleosin altered oil body  
398 morphogenesis and increased lipid content in transgenic rice seeds. *Theor Appl Genet* 126:2289-2297
- 399 Meinke DW, Chen J, Beachy RN (1981) Expression of storage-protein genes during soybean seed development.  
400 *Planta* 153:130-139
- 401 Nakano M, Yamada T, Masuda Y, Sato Y, Kobayashi H, Ueda H, Morita R, Nishimura M, Kitamura K, Kusaba  
402 M (2014) A green-cotyledon/stay-green mutant exemplifies the ancient whole-genome duplications in  
403 soybean. *Plant Cell Physiol* 55:1763-1771
- 404 Nielsen NC, Dickinson CD, Cho TJ, Thanh VH, Scallon BJ, Fischer RL, Sims TL, Drews GN, Goldberg RB  
405 (1989) Characterization of the glycinin gene family in soybean. *Plant Cell* 1:313-328
- 406 O'Malley RC, Alonso JM, Kim CJ, Lisse TJ, Ecker JR (2007) An adapter ligation-mediated PCR method for  
407 high-throughput mapping of T-DNA inserts in the *Arabidopsis* genome. *Nat Protoc* 2:2910-2917
- 408 Rao SS, Hildebrand D (2009) Changes in oil content of transgenic soybeans expressing the yeast SLC1 gene.  
409 *Lipids* 44:945-951
- 410 Scallon B, Thanh VH, Floener LA, Nielsen NC (1985) Identification and characterization of DNA clones  
411 encoding group-II glycinin subunits. *Theor Appl Genet* 70:510-519
- 412 Schmidt MA, Barbazuk WB, Sandford M, May G, Song Z, Zhou W, Nikolau BJ, Herman EM (2011) Silencing  
413 of soybean seed storage proteins results in a rebalanced protein composition preserving seed protein content

414 without major collateral changes in the metabolome and transcriptome. *Plant Physiol* 156:330-345  
415 Schmidt MA, Herman EM (2008) Suppression of soybean oleosin produces micro-oil bodies that aggregate into  
416 oil body/ER complexes. *Mol Plant* 1:910-924  
417 Shimada T, Ogawa Y, Shimada T, Hara-Nishimura I (2011) A non-destructive screenable marker, OsFAST, for  
418 identifying transgenic rice seeds. *Plant Signal Behav* 6:1454-1456  
419 Shimada TL, Hara-Nishimura I (2010) Oil-body-membrane proteins and their physiological functions in plants.  
420 *Biol Pharm Bull* 33:360-363  
421 Shimada TL, Shimada T, Hara-Nishimura I (2010) A rapid and non-destructive screenable marker, FAST, for  
422 identifying transformed seeds of *Arabidopsis thaliana*. *Plant J* 61:519-528  
423 Shimada TL, Shimada T, Takahashi H, Fukao Y, Hara-Nishimura I (2008) A novel role for oleosins in freezing  
424 tolerance of oilseeds in *Arabidopsis thaliana*. *Plant J* 55:798-809  
425 Siloto RM, Findlay K, Lopez-Villalobos A, Yeung EC, Nykiforuk CL, Moloney MM (2006) The accumulation  
426 of oleosins determines the size of seed oilbodies in *Arabidopsis*. *Plant Cell* 18:1961-1974  
427 Tidke SA, Ramakrishna D, Kiran S, Kosturkova G, Ravishankar GA (2015) Nutraceutical Potential of Soybean:  
428 Review. *Asian J Clin Nutr* 7:22-32  
429 Yamada T, Mori Y, Yasue K, Maruyama N, Kitamura K, Abe J (2014) Knockdown of the 7S globulin subunits  
430 shifts distribution of nitrogen sources to the residual protein fraction in transgenic soybean seeds. *Plant Cell*  
431 *Rep* 33:1963-1976  
432 Yamada T, Watanabe S, Arai M, Harada K, Kitamura K (2010) Cotyledonary node pre-wounding with a  
433 micro-brush increased frequency of *Agrobacterium*-mediated transformation in soybean. *Plant*  
434 *Biotechnology* 27:217-220  
435

## 436 **Figure legends**

437 **Fig. 1. Expression of OLE1-GFP in transgenic soybean seeds.** (A) Schematic diagram of the GmFAST-G  
438 vector. *Arabidopsis OLE1* was fused to *GFP* and expressed under the control of the soybean 11S globulin  
439 promoter. (B) Representative GFP fluorescence images of dry mature seeds of wild type (WT) and OLE1-GFP  
440 transgenic lines (#2, #8, and #30). (C) Quantification of GFP fluorescence determined using data from (B). The  
441 mean fluorescence of 10 seeds was determined for each plant. Data represent means  $\pm$  SEMs ( $n = 6$  plants;  $**P$   
442  $< 0.01$ , Student's  $t$  test). (D) Expression of OLE1-GFP in dry seeds of WT and OLE1-GFP transgenic lines (#2,  
443 #8, and #30). Genotyping was performed with specific primers for *OLE1*, *GFP*, and *OLE1-GFP* (upper), and  
444 immunoblotting was performed with anti-GFP and anti-OLE1 (middle). CBB staining was conducted as a  
445 loading control for immunoblotting (lower). Arrowheads indicate  $\alpha$  and  $\beta$  subunits of 7S globulin.

446

447 **Fig. 2. Localization of OLE1-GFP in transgenic soybean seeds.** (A) Representative images of seed cotyledons  
448 of wild type (WT) and OLE1-GFP lines (#2, #8, and #30) after fixation. Top (upper panels) and side (lower  
449 panels) views are shown. (B) Side-view images of adaxial epidermal and palisade mesophyll cells of cotyledons  
450 in WT and OLE1-GFP transgenic lines (#2, #8, and #30), showing the intracellular localization of OLE1-GFP  
451 (left panels) and lipid droplets using Nile red staining (right panels).

452

453 **Fig. 3. Morphology of protein storage vacuoles and oil bodies in transgenic soybean seeds.** Representative  
454 transmission electron micrographs of mature seeds in wild type (WT) and OLE1-GFP transgenic lines (#2, #8,  
455 and #30) showing protein storage vacuoles (PSVs) and oil bodies (OBs). High-magnification images of OBs are  
456 shown in the right panels.

457

458 **Fig. 4. Seed production in transgenic soybean plants.** Dry mature seeds were harvested from wild type (WT)  
459 and OLE1-GFP lines (#2, #8, and #30). (A) Number of seed pods per plant. (B) Total weight of seeds per plant.  
460 (C) Number of seeds per plant. (D) Weight per seed. (E) Percentages of pods with one, two, or three seeds. Data  
461 are means  $\pm$  SEMs ( $n = 6$  plants;  $* P < 0.05$ , Student's  $t$  test).

462

463 **Fig. 5. Fatty acid composition in transgenic soybean seeds.** The fatty acid contents of total seeds (A) and a  
464 100 mg of seeds (B) from the wild type and OLE1-GFP transgenic lines (#2, #8, and #30). C16:0, palmitic acid;  
465 C18:0, stearic acid; C18:1, oleic acid; C18:2, linoleic acid; C18:3, linolenic acid. Data represent means  $\pm$  SEMs  
466 ( $n = 6$  plants;  $*P < 0.05$ , Student's  $t$  test).

467

468 **Fig. 6. Site of the OLE1-GFP insertion in the transgenic soybean line #8 genome.** (A) Schematic  
469 representation of Glyma13g30950.2, showing the site of the *OLE1-GFP* insertion. Gray boxes, untranslated  
470 regions; black box, exon; solid line, intron; arrow heads, primer positions used in B and C. (B) Genotyping in the  
471 wild type (WT) and OLE1-GFP-expressing lines, #2, #8, and #30. G, genomic fragments amplified with a pair  
472 of forward and reverse Glyma13g30950-specific primers (L and R in A); I, an inserted fragment amplified with  
473 a left border primer for pDMC123 vector (LB in A) and Glyma13g30950 reverse primer (R in A). (C) RT-PCR

474 of Glyma13g30950 and *ACTIN11* (control) transcripts in leaves of the WT and OLE1-GFP-expressing lines, #2,  
475 #8, and #30. Fragments were amplified with Glyma13g30950-specific primers (L1 and R1 in A).

476

477 **Fig. 7. Overexpression of *E6L1* enhances seed pod number in Arabidopsis.** (A) RT-PCR of *E6L1* and *EF1a*  
478 (control) transcripts in the wild type (WT) and E6L1-OX lines. (B) Number of seed pods per plant. (C) Number  
479 of seeds per plant. (D) Total weight of seeds per plant. (E) Weight per seed. (F) Number of seeds per pod. Data  
480 are means  $\pm$  SEMs ( $n = 5-6$  plants; \*  $P < 0.05$ , Student's  $t$  test).



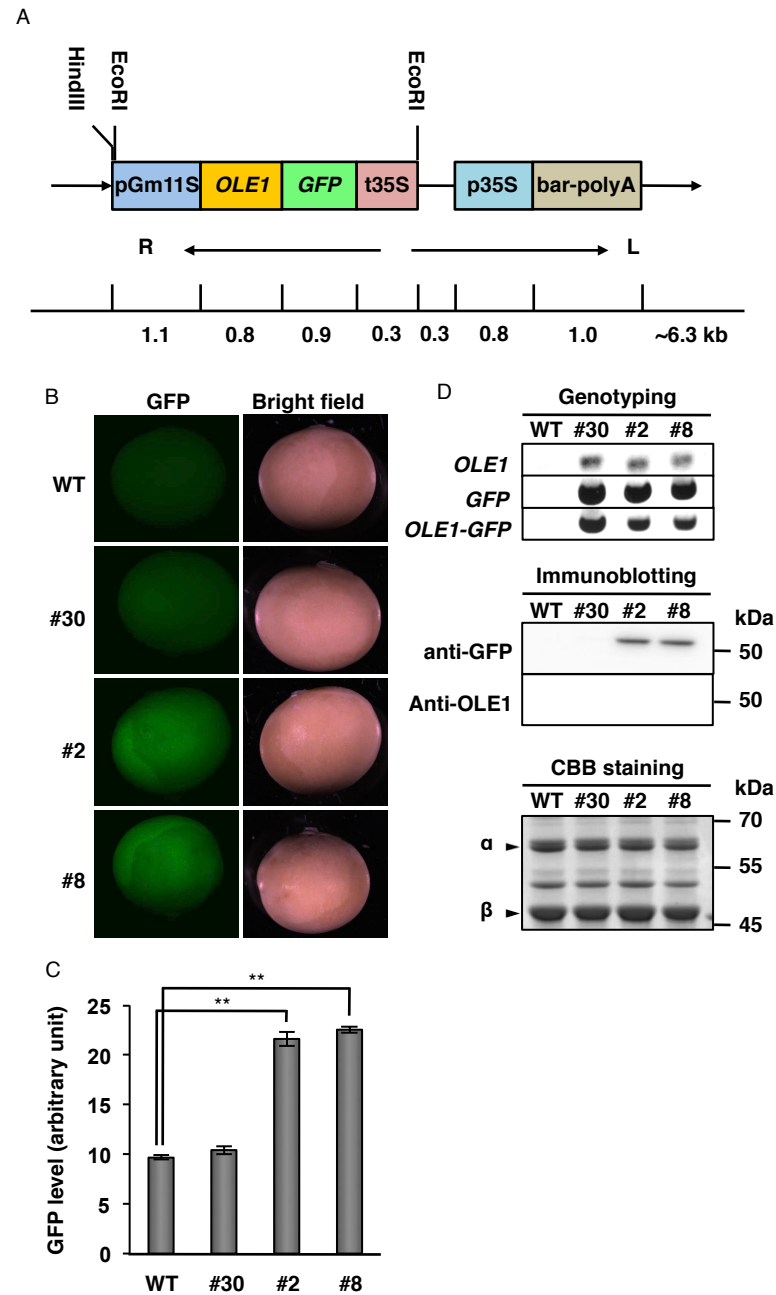

**Fig 1. Expression of OLE1-GFP in transgenic soybean seeds.** (A) Schematic diagram of the GmFAST-G vector. *Arabidopsis OLE1* was fused to *GFP* and expressed under the control of the soybean 11S globulin promoter. (B) Representative GFP fluorescence images of dry mature seeds of wild type (WT) and OLE1-GFP transgenic lines (#2, #8, and #30). (C) Quantification of GFP fluorescence determined using data from (B). The mean fluorescence of 10 seeds was determined for each plant. Data represent means  $\pm$  SEMs ( $n = 6$  plants;  $**P < 0.01$ , Student's *t* test). (D) Expression of OLE1-GFP in dry seeds of WT and OLE1-GFP transgenic lines (#2, #8, and #30). Genotyping was performed with specific primers for *OLE1*, *GFP*, and *OLE1-GFP* (upper), and immunoblotting was performed with anti-GFP and anti-OLE1 (middle). CBB staining was conducted as a loading control for immunoblotting (lower). Arrowheads indicate  $\alpha$  and  $\beta$  subunits of 7S globulin.

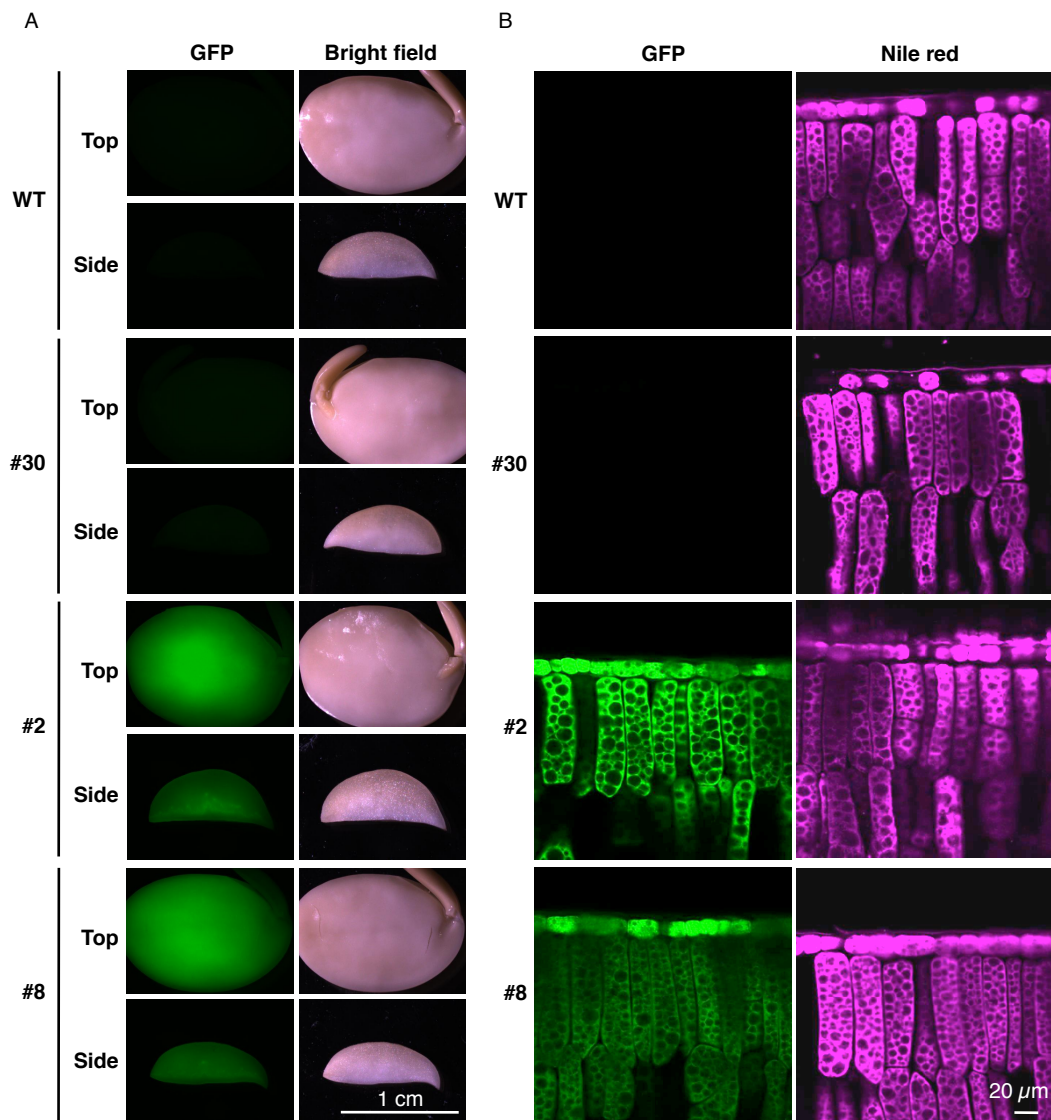

**Fig 2. Localization of OLE1-GFP in transgenic soybean seeds.** (A) Representative images of seed cotyledons of wild type (WT) and OLE1-GFP lines (#2, #8, and #30) after fixation. Top (upper panels) and side (lower panels) views are shown. (B) Side-view images of adaxial epidermal and palisade mesophyll cells of cotyledons in WT and OLE1-GFP transgenic lines (#2, #8, and #30), showing the intracellular localization of OLE1-GFP (left panels) and lipid droplets using Nile red staining (right panels).

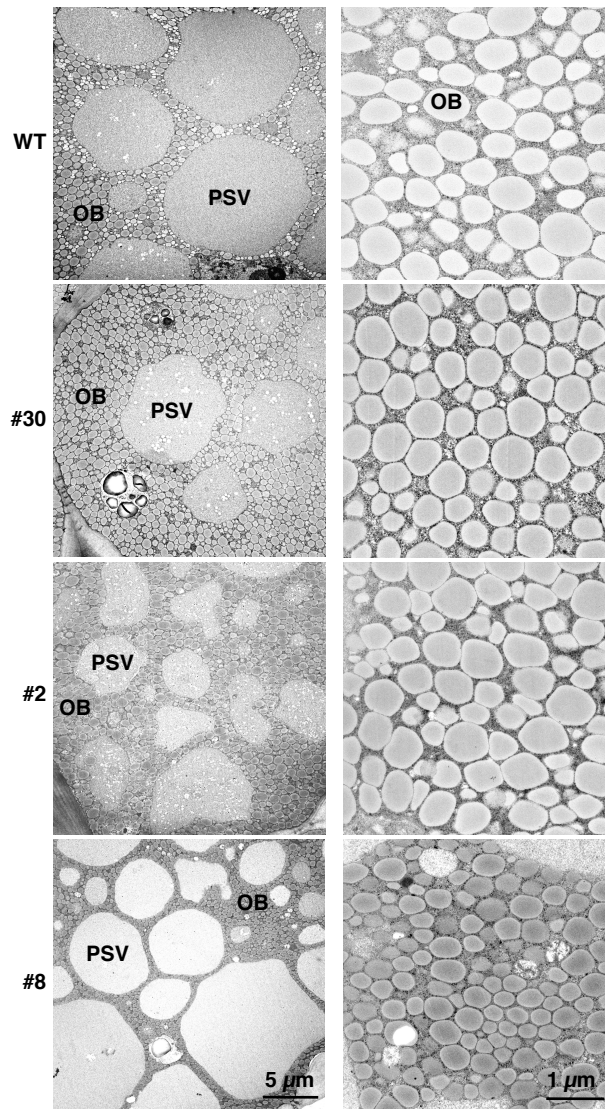

**Fig 3. Morphology of protein storage vacuoles and oil bodies in transgenic soybean seeds.**

Representative transmission electron micrographs of mature seeds in wild type (WT) and OLE1-GFP transgenic lines (#2, #8, and #30) showing protein storage vacuoles (PSVs) and oil bodies (OBs). High-magnification images of OBs are shown in the right panels.

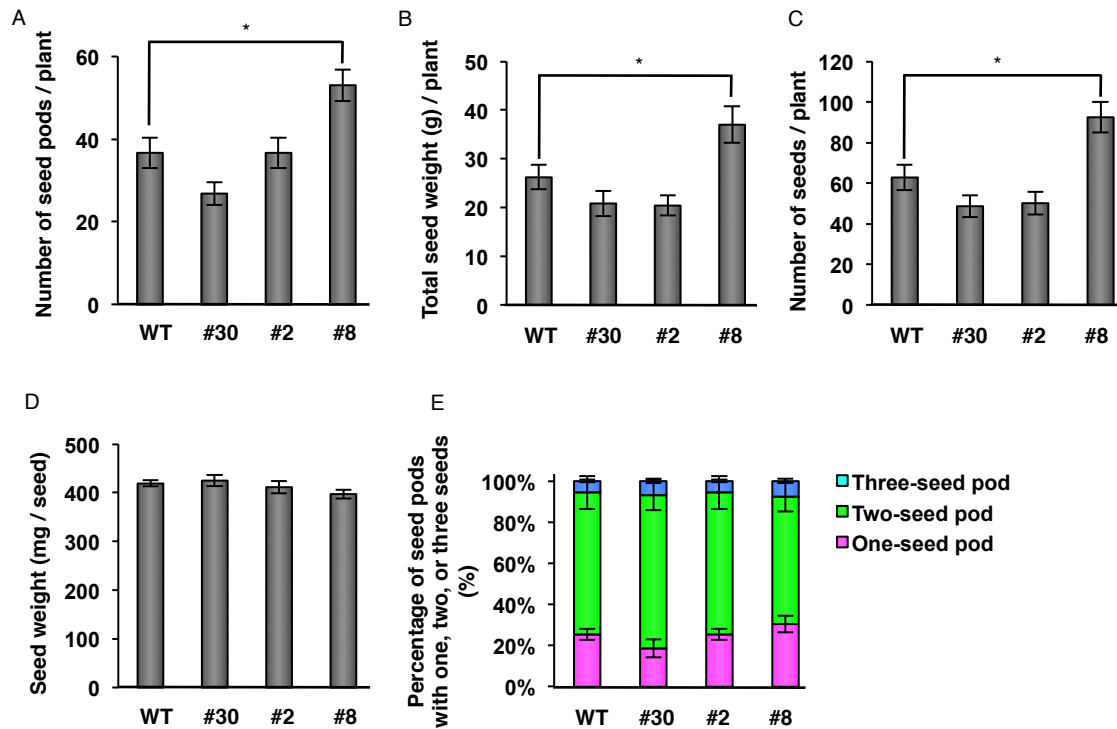

**Fig 4. Seed production in transgenic soybean plants.** Dry mature seeds were harvested from wild type (WT) and OLE1-GFP lines (#2, #8, and #30). (A) Number of seed pods per plant. (B) Total weight of seeds per plant. (C) Number of seeds per plant. (D) Weight per seed. (E) Percentages of pods with one, two, or three seeds. Data are means  $\pm$  SEMs ( $n = 6$  plants; \*  $P < 0.05$ , Student's  $t$  test).

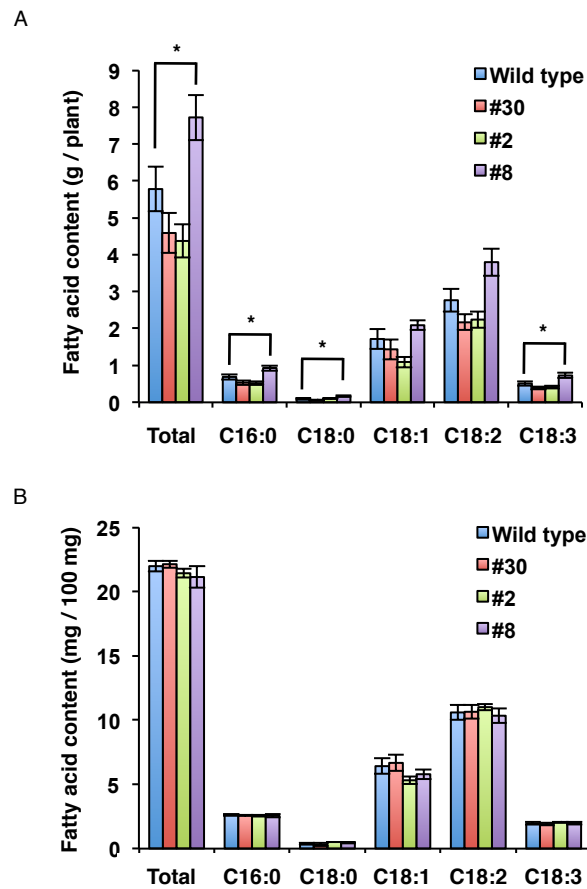

**Fig 5. Fatty acid composition in transgenic soybean seeds.** The fatty acid contents of total seeds (A) and a 100 mg of seeds (B) from the wild type and OLE1-GFP transgenic lines (#2, #8, and #30). C16:0, palmitic acid; C18:0, stearic acid; C18:1, oleic acid; C18:2, linoleic acid; C18:3, linolenic acid. Data represent means  $\pm$  SEMs ( $n = 6$  plants;  $*P < 0.05$ , Student's  $t$  test).

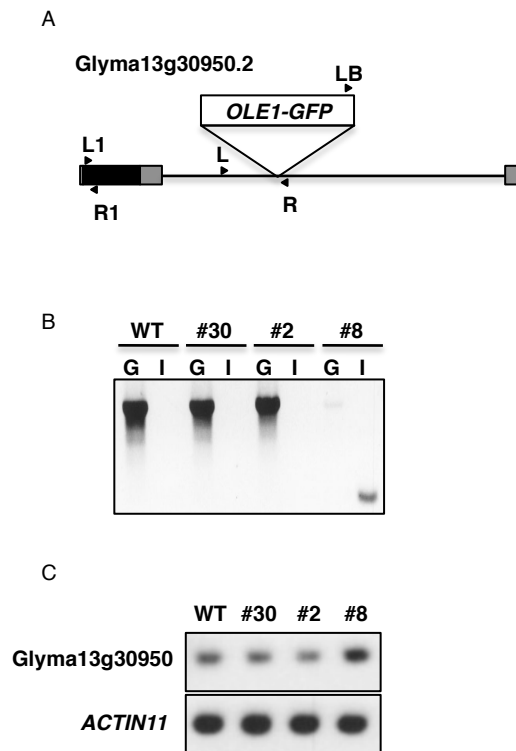

**Fig 6. Site of the *OLE1-GFP* insertion in the transgenic soybean line #8 genome.** (A) Schematic representation of Glyma13g30950.2, showing the site of the *OLE1-GFP* insertion. Gray boxes, untranslated regions; black box, exon; solid line, intron; arrow heads, primer positions used in B and C. (B) Genotyping in the wild type (WT) and *OLE1-GFP*-expressing lines, #2, #8, and #30. G, genomic fragments amplified with a pair of forward and reverse Glyma13g30950-specific primers (L and R in A); I, an inserted fragment amplified with a left border primer for pDMC123 vector (LB in A) and Glyma13g30950 reverse primer (R in A). (C) RT-PCR of Glyma13g30950 and *ACTIN11* (control) transcripts in leaves of the WT and *OLE1-GFP*-expressing lines, #2, #8, and #30. Fragments were amplified with Glyma13g30950-specific primers (L1 and R1 in A).

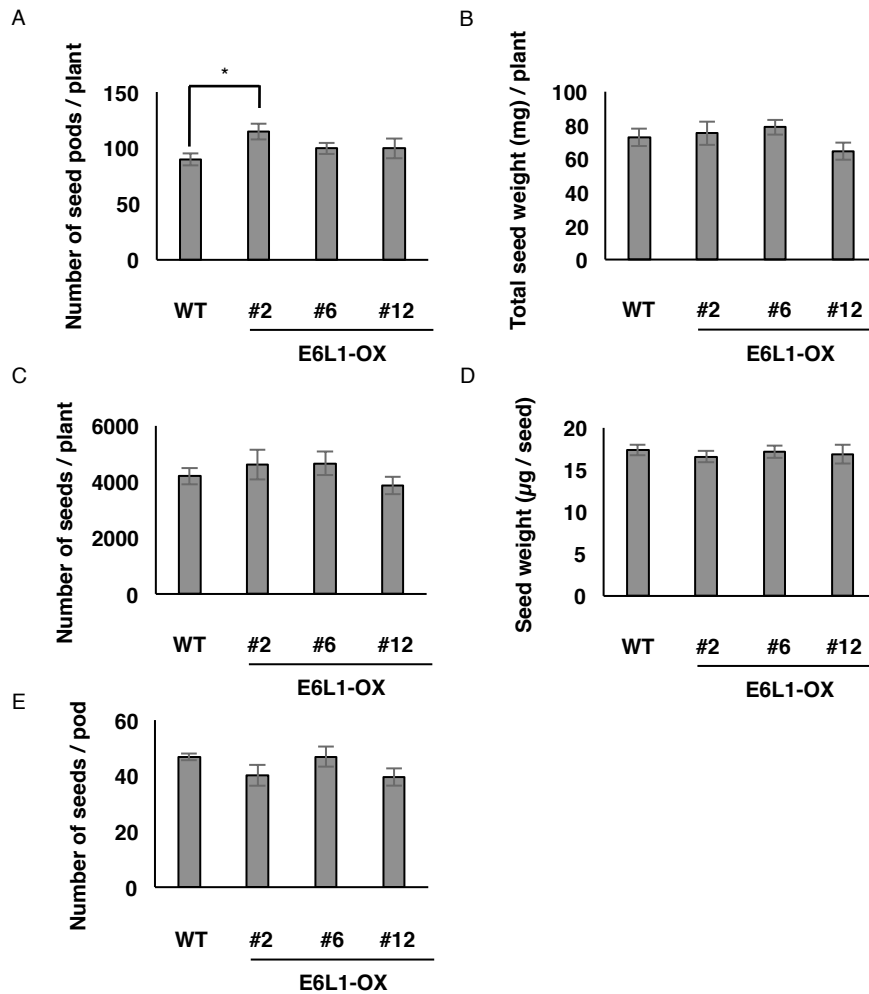

**Fig 7. Overexpression of *E6L1* enhances seed pod number in Arabidopsis.** (A) RT-PCR of *E6L1* and *EF1a* (control) transcripts in the wild type (WT) and E6L1-OX lines. (B) Number of seed pods per plant. (C) Number of seeds per plant. (D) Total weight of seeds per plant. (E) Weight per seed. (F) Number of seeds per pod. Data are means  $\pm$  SEMs ( $n = 5-6$  plants; \*  $P < 0.05$ , Student's  $t$  test).

**Table 1. Comparison between GmFAST and the conventional transgenic soybean selection method.**

| Factors                            | GmFAST method               | Conventional method                                      |
|------------------------------------|-----------------------------|----------------------------------------------------------|
| Transformant identification manner | GFP fluorescence of seeds   | Drug resistance of seedlings                             |
| Homozygote identification timing   | T2 generation (seeds)       | T3 generation (seedlings)                                |
| Segregation analysis treatment     | Not required (in principle) | Required (sowing seeds in plug trays for drug selection) |
| Relative cultivation area          | 0.1                         | 1.0                                                      |
