# Supplementary material for: A space-saving visual screening method, Glycine max FAST, for generating transgenic soybean
Source: bioRxiv or medRxiv preprint supplement (doi:10.1101/797282), 2019-10-08
Supplement: Supplementary file [file media-1.pdf]

## **Electronic supplementary materials**

**Title:**

A space-saving visual screening method, *Glycine max* FAST, for generating transgenic soybean

**Authors:**

Kosei Iwabuchi (Faculty of Science and Engineering, Konan University)

Takashi L. Shimada (Graduate School of Horticulture, Chiba University)

Tetsuya Yamada (Graduate School of Agriculture, Hokkaido University)

Ikuko Hara-Nishimura (Faculty of Science and Engineering, Konan University)

**Journal:**

*Journal of Plant Research*

**Corresponding author:**

Ikuko Hara-Nishimura

Faculty of Science and Engineering, Konan University, Kobe 658-8501, Japan

E-mail: [ihnishi@gr.bot.kyoto-u.ac.jp](mailto:ihnishi@gr.bot.kyoto-u.ac.jp)

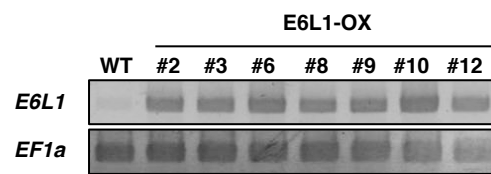

**Fig. S1 RT-PCR of *E6L1* and in *EF1a* (control) transcripts in the wild type (WT) and E6L1-OX lines.**
